# Supplementary material for: The effects of the interstitial pores of buckypaper in trapping cobalt phthalocyanine and their use in sugarcane-extract fuel cells
Source: Royal Society of Chemistry journal article supplement (doi:10.1039/d1tc03362j), 2021-01-01
Supplement: d1tc03362j1.pdf [file d1tc03362j1.pdf]

## Supporting Information

### **The effects of the interstitial pores of buckypaper to trap cobalt phthalocyanine and their use for sugarcane-extract fuel cells**

*Jungyeon Ji<sup>1</sup>, Chanho Noh<sup>1</sup>, Yongjin Chung<sup>2,\*</sup> and Yongchai Kwon<sup>1,3,\*</sup>*

<sup>1</sup> Graduate school of Energy and Environment, Seoul National University of Science and  
Technology, 232 Gongneung-ro, Nowon-gu, Seoul 01811, Republic of Korea

<sup>2</sup> Department of Chemical and Biological Engineering, Korea National University of  
Transportation, 50 Daehak-ro, Chungju-si, Chungcheongbuk-do 27469, Republic of Korea

<sup>3</sup> Department of Chemical and Biomolecular Engineering, Seoul National University of Science  
and Technology, 232 Gongneung-ro, Nowon-gu, Seoul 01811, Republic of Korea

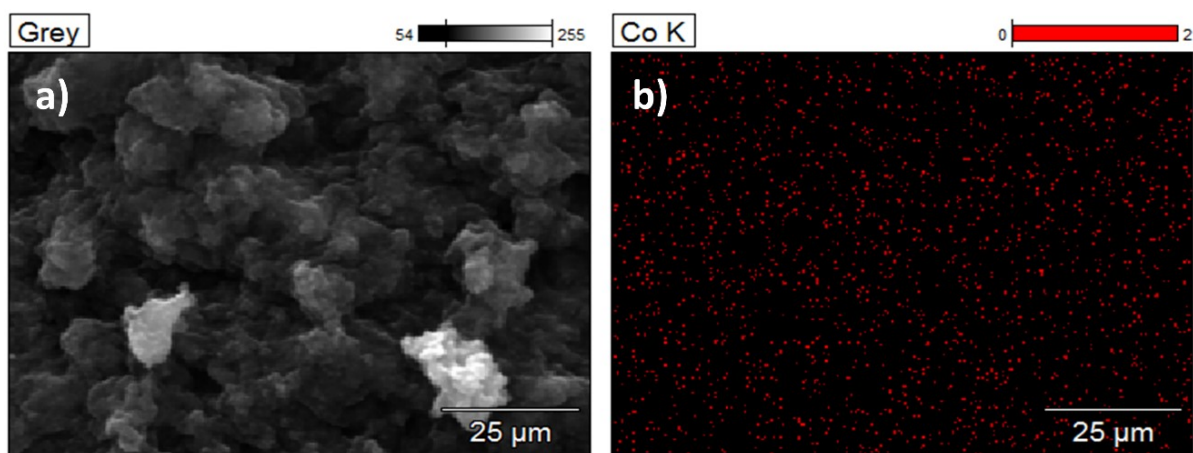

**Figure S1.** SEM images and EDS mapping images of CNT/CoPc.

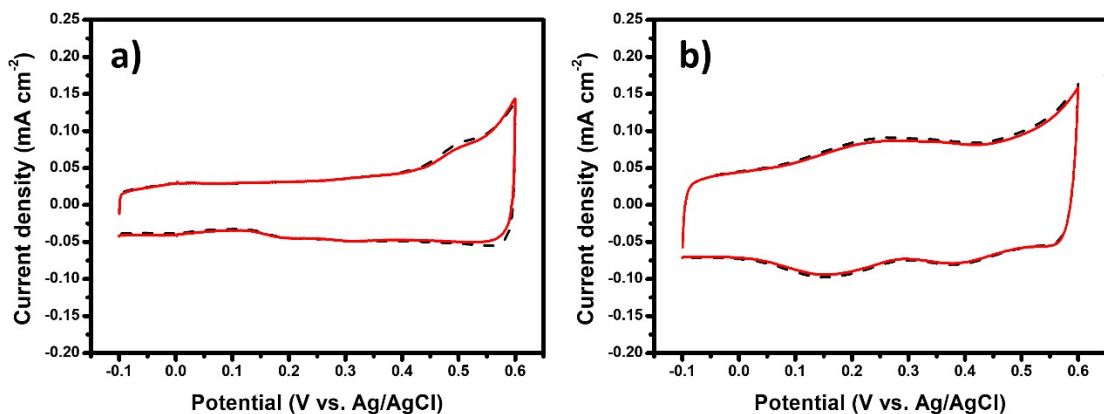

**Figure S2.** CV curves of CNT/CoPc in (a) a pH 7.4 buffer solution (neutral condition) and in (b) a pH 4 buffer solution (acidic condition) measured in the absence of glucose (dashed line) and the presence of 40 mM glucose (solid line). For these tests, the potential scan rate was 20 mV s<sup>-1</sup> in N<sub>2</sub> state.

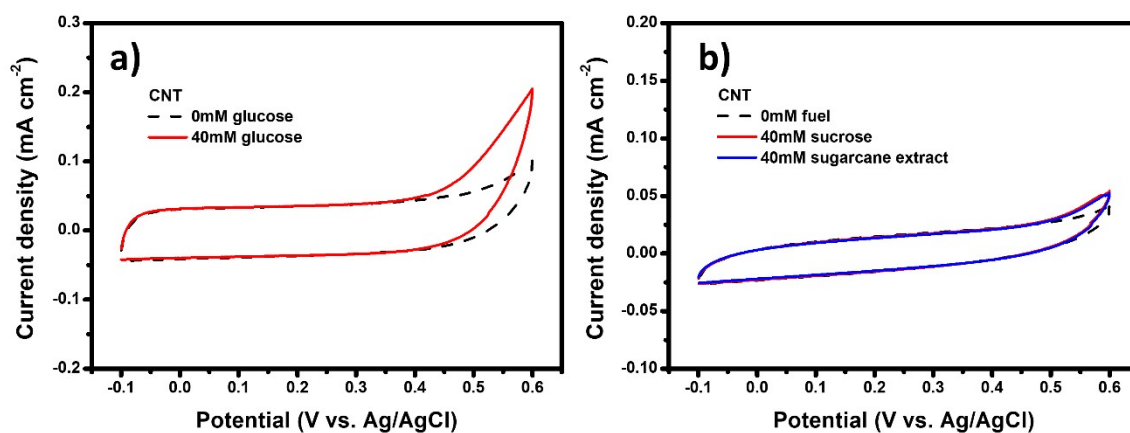

**Figure S3.** CV curves of CNT in the presence of (a) 40 mM glucose and (b) 40 mM sucrose or sugarcane extract. The dashed lines were the results measured without the supply of fuel. For the tests, 0.1M KOH was used as an electrolyte, and the potential scan rate was 20mV s<sup>-1</sup> in N<sub>2</sub> state.

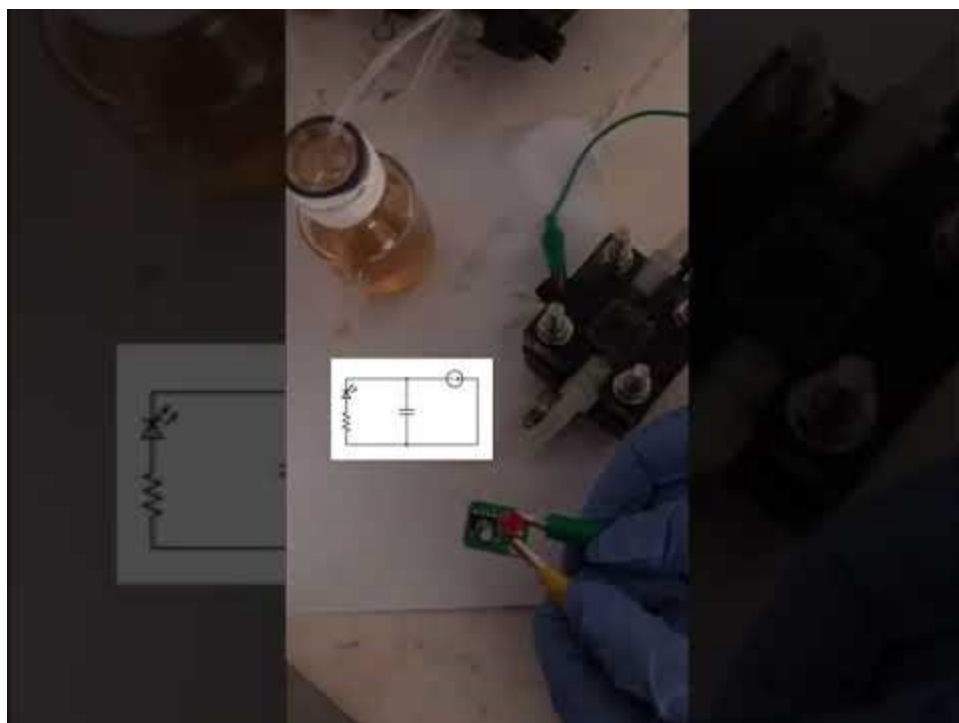

**Supplementary video 1.** The LED blinker lighting experiment using SCEFC.  
(<https://youtu.be/aud6vcbATAE>)
